# Supplementary material for: Ion conduction behaviour in chemically crosslinked hybrid ionogels: effect of free-dangling oligoethyleneoxides
Source: Royal Society of Chemistry journal article supplement (doi:10.1039/c5ra18856c), 2015-01-01
Supplement: c5ra18856c1.pdf [file c5ra18856c1.pdf]

## Supporting Information for:

### Ion Conduction Behaviour in Chemically Crosslinked Hybrid Ionogels: Effect of Free-dangling Oligoethyleneoxides

Albert S. Lee,<sup>a†</sup> Jin Hong Lee,<sup>a,b†</sup> Soon Man Hong,<sup>a,c</sup> Jong-Chan Lee,<sup>b</sup> Seung Sang Hwang<sup>a,c†</sup> and Chong Min Koo<sup>a,c\*</sup>

*† These authors contributed equally.*

<sup>a</sup> Materials Architecturing Research Centre, Korea Institute of Science and Technology, Hwarangno 14-gil 5, Seong-Buk Gu, Seoul 136-791.

<sup>b</sup> Department of Chemical and Biological Engineering, and Institute of Chemical Process, Seoul National University, 599 Gwanak-ro, Gwanak-gu, Seoul 151-744.

<sup>c</sup> Nanomaterials Science and Engineering, University of Science and Technology, 217 Gajungro, 176 Gajung-dong, Yuseong-Gu, Daejeon, Korea 305-333

*† These authors contributed equally.*

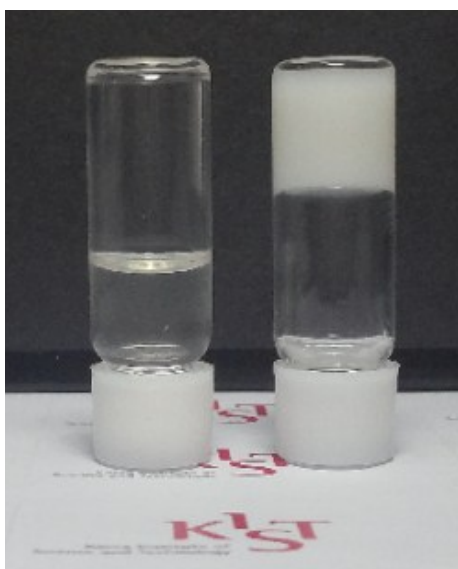

Supporting Figure S1. Vial showing LPEOMASQ75 5 wt% before and after thermal treatment

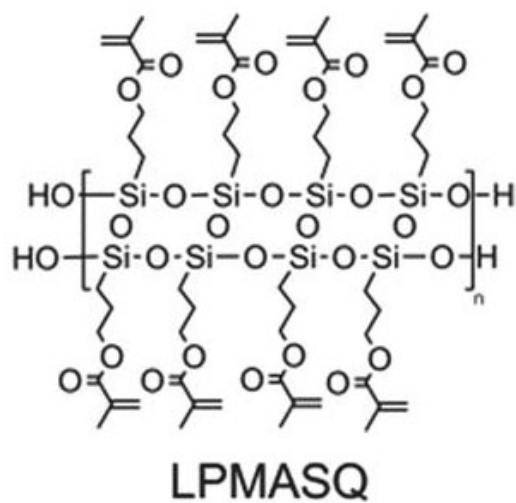

Supporting Figure S2. Chemical structure of LPMASQ

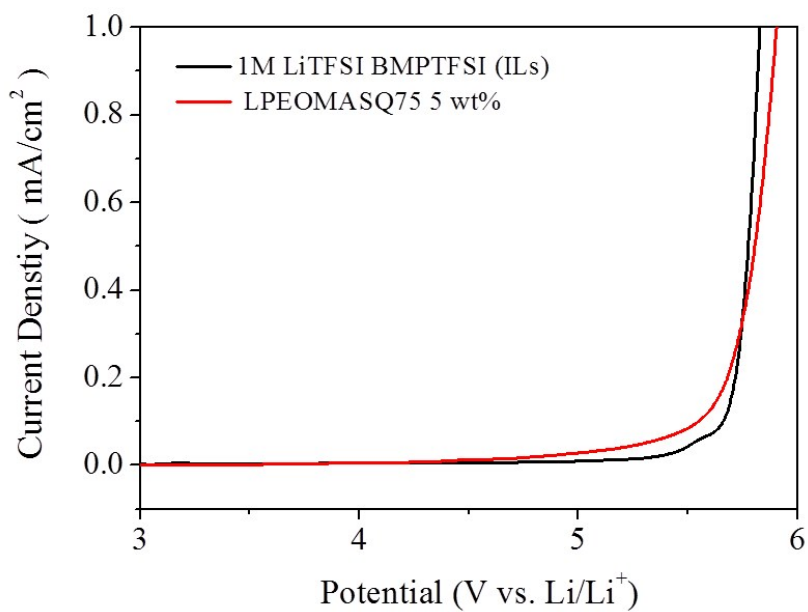

Supporting Figure S3. Linear Sweep Voltamogram of BMPTFSI and LPEOMASQ75 5 wt% Hybrid Ionogel

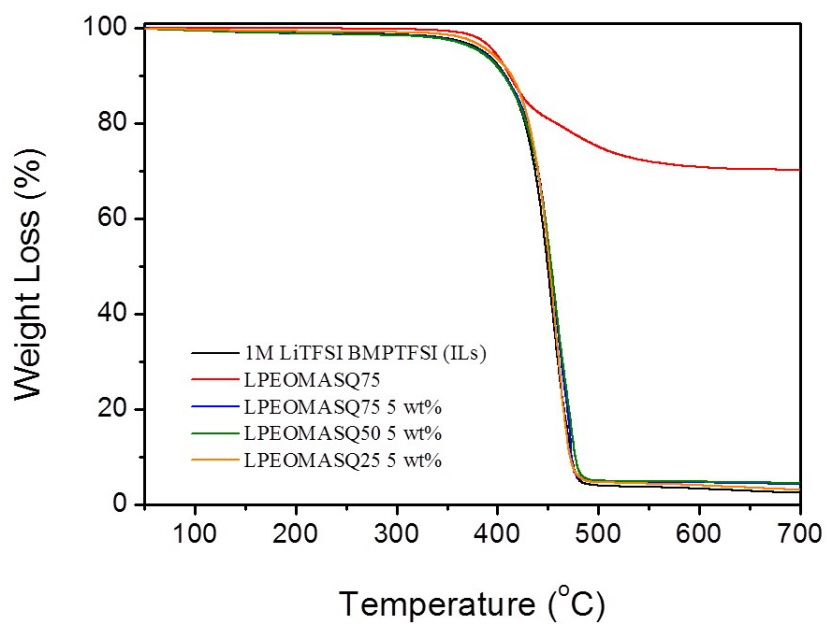

Supporting Figure S4. TGA Thermograms of BMPTFSI, and hybrid ionogels

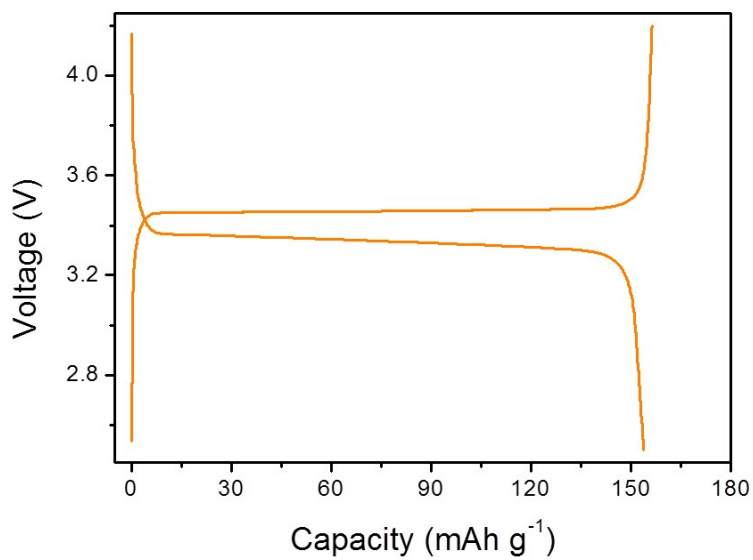

Supporting Figure S5. Representative charge-discharge profile of cell fabricated with 1M LiTFSI BMPTFSI
